# Supplementary material for: Functional ingredients from microalgae
Source: Royal Society of Chemistry journal article supplement (doi:10.1039/c4fo00125g), 2014-01-01
Supplement: c4fo00125g3.pdf [file c4fo00125g3.pdf]

**Table 3S.** Assessment of the health effect of microalgae and their components evaluated by human studies.

| Species                        | Metabolites, extracts or biomass | Health effect                                                                                      | Human clinical study                                                                                                                                                                                                                                                         | Ref.    |
|--------------------------------|----------------------------------|----------------------------------------------------------------------------------------------------|------------------------------------------------------------------------------------------------------------------------------------------------------------------------------------------------------------------------------------------------------------------------------|---------|
| <i>Arthrospira maxima</i>      | Phycobiliproteins<br><br>Biomass | Anti-hyperlipidemia;<br>Reduction postprandial lipemia                                             | Healthy volunteers (Male);<br>Patients with ischemic heart disease;<br>Patients with type 2 diabetes mellitus;<br>Patients with nephritic syndrome;<br>Healthy volunteers;<br>Healthy elderly volunteers;<br>Elderly Women with hypercholesterolemia;<br>Young human runners | 202-212 |
| <i>Chlorella sp.</i>           | Carotenoids                      | Improving the carotenoid status of breast milk at early lactation                                  | Healthy pregnant women                                                                                                                                                                                                                                                       | 213     |
| <i>Chlorella vulgaris</i>      | Biomass                          | Antioxidant                                                                                        | Smokers                                                                                                                                                                                                                                                                      | 214     |
| <i>Dunaliella salina</i>       | $\beta$ -carotene                | Antioxidant                                                                                        | Human subject                                                                                                                                                                                                                                                                | 215     |
| <i>Dunaliella bardawil</i>     | $\beta$ -carotene                | Anti-hyperlipidemia                                                                                | Men                                                                                                                                                                                                                                                                          | 190     |
| <i>Haematococcus pluvialis</i> | Astaxanthin<br><br>Extract       | Improve metabolic syndrome and cognitive function;<br>Anti cardiovascular diseases;<br>Antioxidant | Healthy adult volunteers;<br>Healthy volunteers at risk of metabolic syndrome;<br>Smokers                                                                                                                                                                                    | 216-218 |
| <i>Nannochloropsis oculata</i> | EPA                              | Blood EPA level                                                                                    | Healthy males aged 18-45 years                                                                                                                                                                                                                                               | 219     |
| <i>Porphyridium sp.</i>        | Polysaccharides                  | Anti-inflammatory                                                                                  | Female volunteers                                                                                                                                                                                                                                                            | 80      |
| <i>Ulkenia</i>                 | DHA+EPA                          | Beneficial omega-3 index                                                                           | Healthy vegetarians                                                                                                                                                                                                                                                          | 220     |
